# Supplementary material for: One “Click” to controlled bifunctional supported catalysts for the Cu/TEMPO-catalyzed aerobic oxidation of alcohols
Source: Royal Society of Chemistry journal article supplement (doi:10.1039/c6ra05026c), 2016-01-01
Supplement: c6ra05026c1.pdf [file c6ra05026c1.pdf]

Supporting Information

# One “Click” to Controlled Bifunctional Supported Catalysts for the Cu/TEMPO-Catalyzed Aerobic Oxidation of Alcohols

Antony E. Fernandes,<sup>[a],[b]</sup> Olivier Riant,<sup>[a]</sup> Alain M. Jonas,<sup>[a]</sup> and Klavs F. Jensen<sup>[b]</sup>

[a] Institute of Condensed Matter and Nanosciences, Université catholique de Louvain, Louvain-la-Neuve, 1348, Belgium

[b] Department of Chemical Engineering, Massachusetts Institute of Technology, Cambridge, MA 02139, U.S.A.

E-mail: antony.fernandes@uclouvain.be, kfjensen@mit.edu

Reagents were obtained from commercial sources and used without further purification. All reactions were carried out under N<sub>2</sub>. Spherical silica gel (40-75 μm, 100 Å) was purchased from Sorbtech Technologies. Milli-Q water (resistivity 18.2 MΩ.cm) was obtained from a Millipore system (Elga Purelab Ultra). FT-IR was measured on a Thermo Scientific FTIR 6700 spectrometer. TGA was measured on a TA Q5000 instrument. Physisorption measurements were done on a Quantachrome Autosorb-iQ system. AAS was performed on a Agilent 200 Series AA spectrometer equipped with a GTA 120 graphite tube atomizer. Prior to AAS analysis, the samples were treated with ultrapure aqua regia (3:1 concentrated HCl:HNO<sub>3</sub>) and the resulting solution diluted 500 times before analysis. **(Caution! Aqua regia is a very corrosive oxidizing agent, which should be handled with great care).** NMR spectra were recorded on a Bruker-400 spectrometer. XPS was performed on a Physical Electronics Phi5000 Versaprobe II instrument. EPR spectra were obtained using a Bruker EMX spectrometer. GC was performed on a Hewlett Packard HP 6890 Series equipped with a FID and MS detector.

## Synthetic procedure

### *Preparation of azide-functionalized silica 1*

Commercially available spherical silica gel (Sorbtech Technologies, 40-75  $\mu\text{m}$ , 100  $\text{\AA}$ ) was activated by boiling in HCl 6 M for 1 day. The silica was filtered and washed with deionized water until neutral pH and dried in oven for 2 days at 120  $^{\circ}\text{C}$ . The resulting silica was then placed in a round-bottom flask and heated at 120  $^{\circ}\text{C}$  under vacuum for 2 hours. The flask was then allowed to cool to room temperature and toluene (20 mL/g) was added together with AzPTMS<sup>1</sup> (2 mmol/g) and the resulting mixture refluxed overnight. The silica was then filtered, washed with toluene,  $\text{CH}_2\text{Cl}_2$  and finally extracted using a  $\text{CH}_2\text{Cl}_2$  soxhlet for 1 day. The obtained azide functionalized silica was placed in a round-bottom flask and dried under vacuum at 60  $^{\circ}\text{C}$  overnight. The flask was then cooled with liquid nitrogen and HMDS (1.5 mL/g) was added under vacuum. The resulting mixture was finally heated at 80  $^{\circ}\text{C}$  for 8 hours. The silica was filtered, washed with  $\text{CH}_2\text{Cl}_2$  and finally extracted using a  $\text{CH}_2\text{Cl}_2$  soxhlet for 1 day to give **1**.

### *General procedure for the CuAAC ligation*

Azide-functionalized silica **1** was suspended in degassed DMF (15 mL/g). Alkyne(s) (1.4 equiv.) was added followed by  $\text{Et}_3\text{N}$  (5 equiv.) and CuI (10 mol%). The reaction was stirred at 50  $^{\circ}\text{C}$  for 2 days and monitored by FT-IR. The functionalized silica was recovered by filtration, washed with  $\text{CH}_3\text{CN}$ ,  $\text{Na}_2\text{EDTA}$  (0.05 M), water,  $\text{CH}_3\text{CN}$ ,  $\text{CH}_2\text{Cl}_2$  and finally extracted using a  $\text{CH}_3\text{CN}$  soxhlet for 1 day.

### *General procedure for Cu complexation*

Pyta-functionalized silica **4** and **6a-e** were suspended in a degassed solution of  $\text{Cu}(\text{CH}_3\text{CN})_4\text{OTf}$  in  $\text{CH}_3\text{CN}$  (0.02 M, 20 mL/g of silica) and the reaction stirred 1 day at room temperature. The suspension was then filtered and washed thoroughly with  $\text{CH}_2\text{Cl}_2$ .

### *Representative procedure for the aerobic oxidation of alcohols*

The catalyst was added to a solution of alcohol (0.26 mmol) and dodecane (0.26 mmol) in toluene (0.2 M) and heated at 80  $^{\circ}\text{C}$  under  $\text{O}_2$  bubbling (5.5 mL/min). Aliquots (10  $\mu\text{L}$ ) were periodically taken and analyzed by GC.

## FT-IR

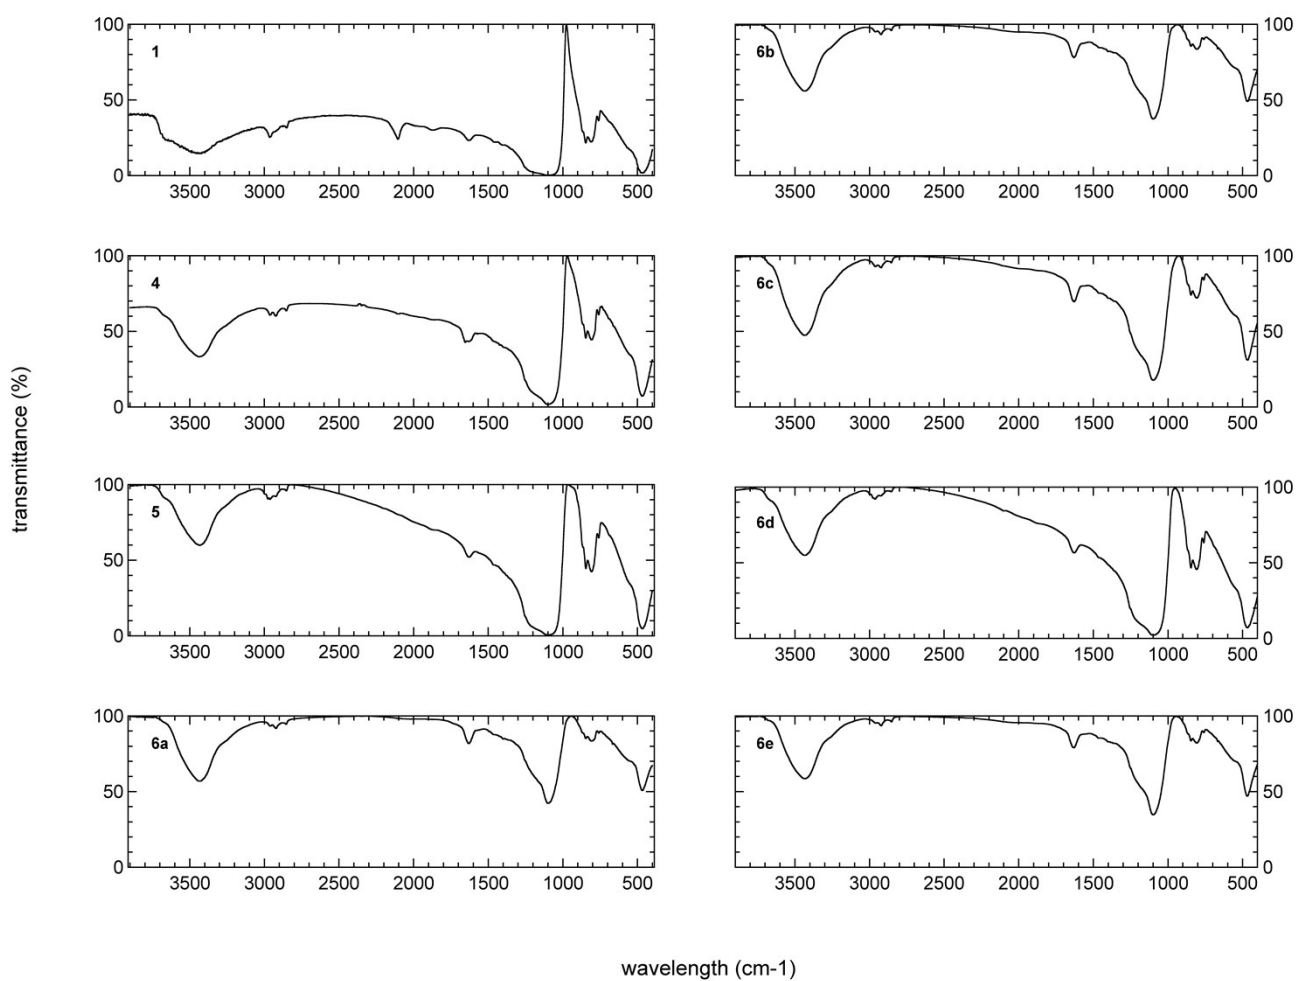

Figure S1. FT-IR spectra of **1**, **4**, **5** and **6a-e**.

## TGA

Thermogravimetric analysis was done at a temperature ramp rate of 10 °C/min under N<sub>2</sub>.

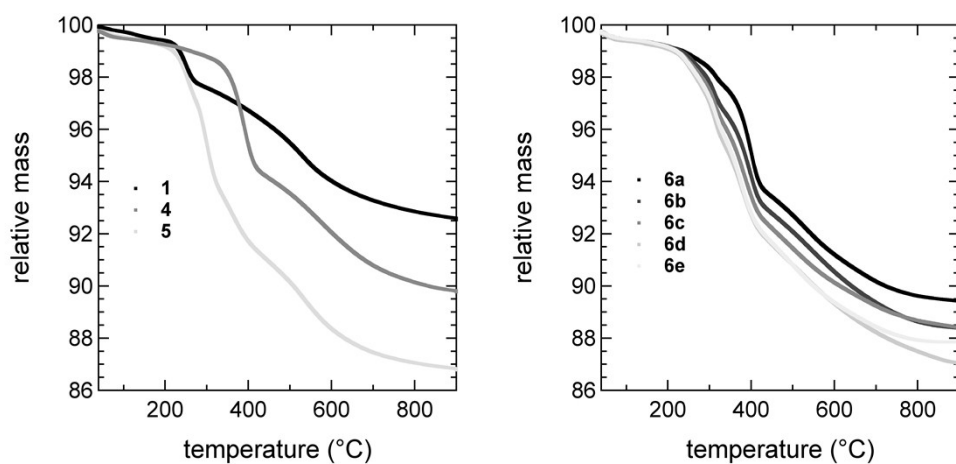

Figure S2. TGA of **1**, **4**, **5** and **6a-e**.

# XPS

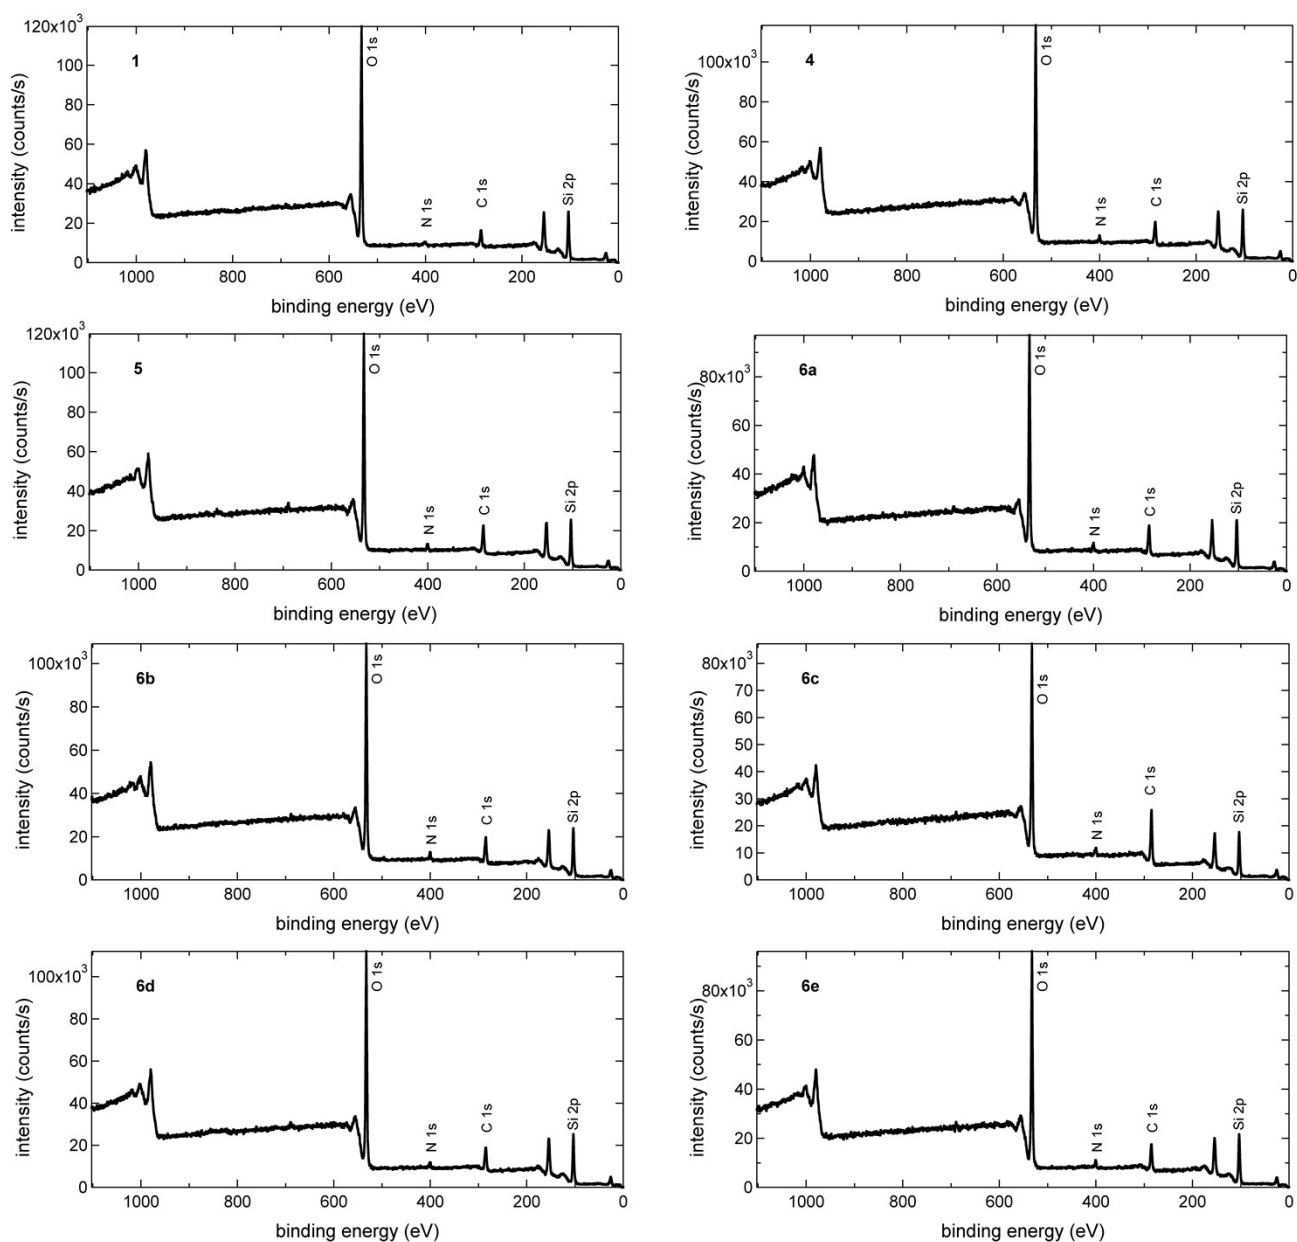

Figure S3. XPS survey scan of 1, 4, 5 and 6a-e.

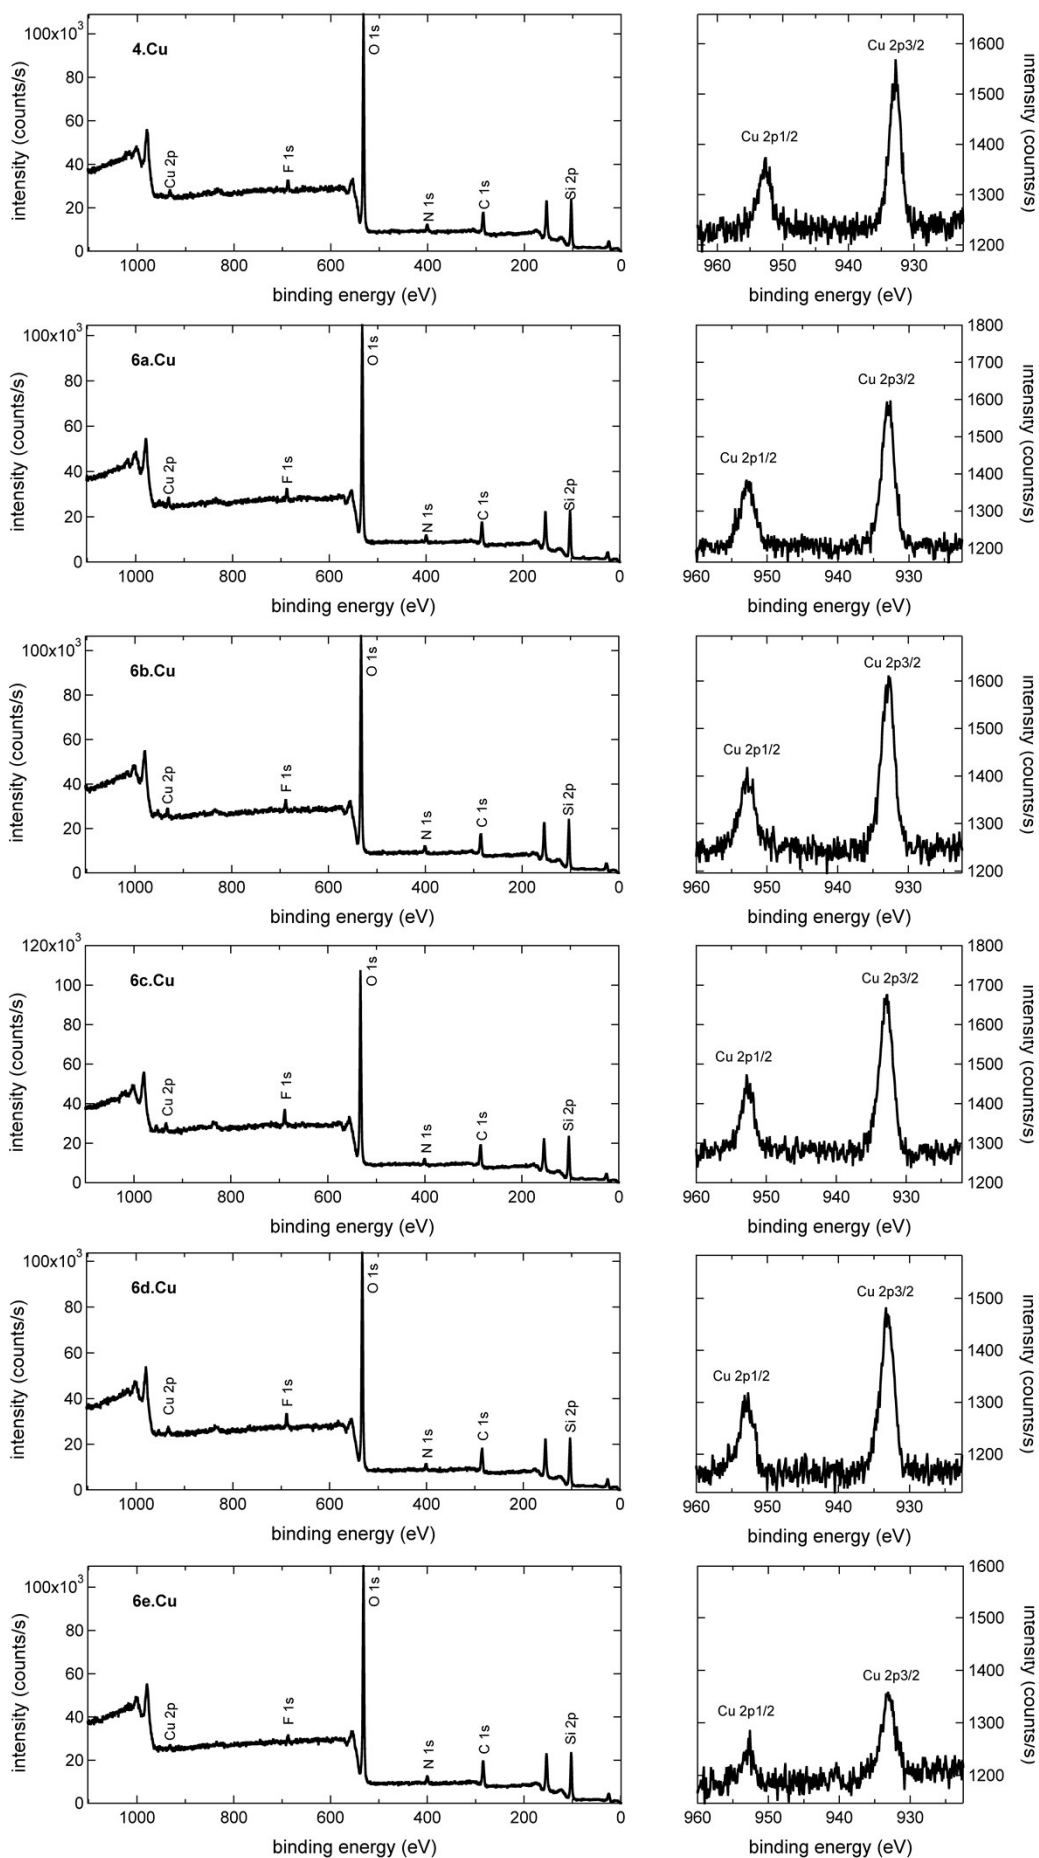

Figure S4. XPS survey scan and Cu 2p HR region of **4.Cu** and **6a-e.Cu**.

## Physisorption

| Sample    | $S_{\text{BET}}$ (m <sup>2</sup> /g) | Pore volume<br>(BJH, desorption) (cm <sup>3</sup> /g) | Pore diameter<br>(BJH, desorption) (nm) |
|-----------|--------------------------------------|-------------------------------------------------------|-----------------------------------------|
| <b>1</b>  | 293                                  | 0.66                                                  | 6.80                                    |
| <b>4</b>  | 250                                  | 0.54                                                  | 6.26                                    |
| <b>5</b>  | 269                                  | 0.58                                                  | 5.76                                    |
| <b>6a</b> | 231                                  | 0.53                                                  | 5.82                                    |
| <b>6b</b> | 238                                  | 0.54                                                  | 5.80                                    |
| <b>6c</b> | 213                                  | 0.52                                                  | 5.42                                    |
| <b>6d</b> | 249                                  | 0.54                                                  | 5.80                                    |
| <b>6e</b> | 222                                  | 0.46                                                  | 6.26                                    |

Table S1. Physisorption analysis of **1,4,5** and **6a-e**.

## EPR

EPR calibration curve was prepared by mixing TEMPO with pristine mesoporous spherical silica.

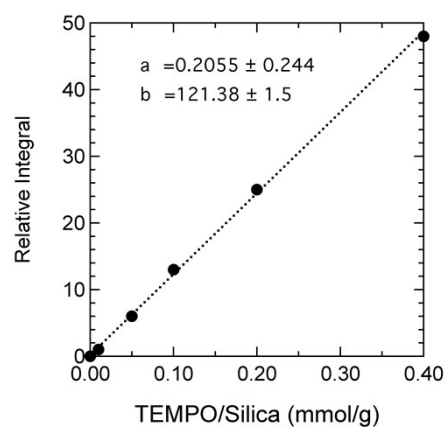

Figure S5. EPR calibration curve of TEMPO/silica.

## Catalysis

| Catalyst          | % of <b>2</b> | $k$ ( $\times 10^{-5} \text{ s}^{-1}$ ) |
|-------------------|---------------|-----------------------------------------|
| <b>6a.Cu</b>      | 75            | 1.01                                    |
| <b>6b.Cu</b>      | 50            | 1.92                                    |
| <b>6c.Cu</b>      | 25            | 2.25                                    |
| <b>6d.Cu</b>      | 12.5          | 2.66                                    |
| <b>6e.Cu</b>      | 6.25          | 1.07                                    |
| <b>4.Cu/TEMPO</b> | -             | n.d.                                    |
| <b>4.Cu + 5</b>   | -             | n.d.                                    |

Table S2. Pseudo-rate constants  $k$ . Conditions: BnOH (0.26 mmol), dodecane (0.26 mmol) in toluene (0.2 M), O<sub>2</sub>, 80 °C.

## Reference

- 1 L. Deiana, L. Ghisu, S. Afewerki, O. Verho, E. V. Johnston, N. Hedin, Z. Bacsik and A. Córdova, *Adv. Synth. Catal.*, 2014, **356**, 2485.
